# Supplementary material
Source: Springer Nature journal article supplement (https://www.springermedizin.de/resource/supplementary/13024_2014_537_MOESM6_ESM.pdf/9644342)

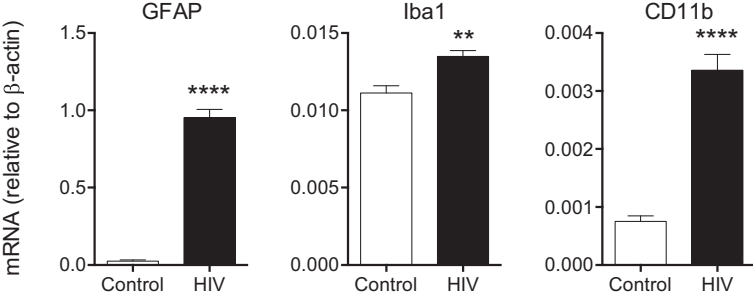

Supplement: MOESM6 [file 9644342]
